# Supplementary material for: Evaluation of DDGS as a Low-Cost Feed Ingredient for Common Carp (Cyprinus carpio Linneus) Cultivated in a Semi-Intensive System
Source: MDPI journal article supplement (doi:10.3390/life12101609), 2022-10-14
Supplement: s1 [file s1]

**Table S1.** Proximate composition of ingredients used for common carp diet

| Parameter  | DDGS  | Corn  | Wheat | Fish meal | Sunflower meal |
|------------|-------|-------|-------|-----------|----------------|
| Humidity % | 11.5  | 13.63 | 14.02 | 9.50      | 9.93           |
| Protein %  | 27.56 | 7.54  | 8.07  | 39.9      | 40.6           |
| Oil %      | 6.75  | 3.10  |       |           |                |
| Fiber %    | 10.13 |       |       |           | 22.6           |
| Ash %      | 3.6   |       |       | 24.3      | 7.63           |
| ADF %      | 16.6  |       |       |           |                |
| NDF %      | 38.3  |       | 26.80 |           |                |
| Starch %   | 1.57  | 66.66 | 68.8  |           |                |
| S %        | 0.47  |       |       |           |                |
| P %        | 0.7   |       |       |           |                |
| Fat %      |       |       |       | 8.9       | 1.76           |
| N total    |       |       |       | 242       |                |
| mg/100g    |       |       |       |           |                |
| Histamine  |       |       |       | 12100     |                |
| ppm        |       |       |       |           |                |
| FFA        |       |       |       | 77.88     |                |
| Acidity    |       |       |       | 50.32     |                |

**Table S2.** Determination of aerobic and anaerobic bacterial density cfu / g intestinal content of common carp

| Parameter / treatment | Sample 1 | Sample 2 | Sample 3 | Sample 4 | Sample 5 | Mean     |
|-----------------------|----------|----------|----------|----------|----------|----------|
| TNA D0                | 2360000  | 1980000  | 1680000  | 2210000  | 2980000  | 2242000  |
| TNA D1                | 3320000  | 4210000  | 3020000  | 3820000  | 3930000  | 3660000  |
| TNA D2                | 23900000 | 33100000 | 28900000 | 11200000 | 3700000  | 20160000 |
| TNAN D0               | 1200     | 6000     | 320      | 220      | 1100     | 1768     |
| TNAN D1               | 700      | 1200     | 1100     | 1700     | 2900     | 1520     |
| TNAN D2               | 1100     | 2900     | 3300     | 700      | 6400     | 2880     |
| TNC D0                | 620      | 600      | 200      | 110      | 483      | 402.6    |
| TNC D1                | 522      | 394      | 647      | 891      | 1300     | 750.8    |
| TNC D2                | 720      | 800      | 722      | 520      | 933      | 739      |
| TNE D0                | 1414000  | 970000   | 705000   | 1016000  | 1192000  | 1059400  |
| TNE D1                | 1762000  | 22980000 | 1812000  | 2330000  | 2200000  | 6216800  |
| TNE D2                | 13623000 | 19529000 | 17975000 | 6977000  | 2220000  | 12064800 |

TNA - total number of aerobic microorganisms

TNAN - total number of anaerobic microorganisms

TNC - total number of sulfite-reducing clostridia

TNE - total number of Enterobacteriaceae

CFU/g= colony-forming unit per gram
